# Supplementary material for: The Impact of Candida albicans in the Development, Kinetics, Structure, and Cell Viability of Biofilms on Implant Surfaces—An In Vitro Study with a Validated Multispecies Biofilm Model
Source: MDPI journal article supplement (doi:10.3390/ijms25063277), 2024-03-14
Supplement: s1 [file s1]

**Supplementary Table S1.** Counts (expressed as mean and standard deviation (SD) and 95% confidence intervals (CI) for means) of microbial species (colony-forming units (CFUs)/mL) determined by quantitative polymerase chain reaction (qPCR) in 24, 48, and 72 h biofilms on dental implants in the presence (test) and absence (control) of *Candida albicans* (n=9), using specific primers and probes directed to the 16S rRNA gene.

\*  $p < 0.05$ , statistically significant differences when comparing CFU/mL between test and control biofilms at each time interval. Comparisons between groups were performed considering viable cells and total cells.

| Species                       | Incubation time (hours) | Analysis | Condition | Microbial counts (CFU/ml) |                      |                      |                      | % Viability |       |
|-------------------------------|-------------------------|----------|-----------|---------------------------|----------------------|----------------------|----------------------|-------------|-------|
|                               |                         |          |           | Mean                      | (SD)                 | 95% CI               |                      | Mean        | (SD)  |
|                               |                         |          |           |                           |                      | Lower limit          | Upper limit          |             |       |
| <i>Streptococcus oralis</i>   | 24                      | Total    | Control   | 1.13x10 <sup>7</sup>      | 6.71x10 <sup>6</sup> | 4.04x10 <sup>5</sup> | 1.87x10 <sup>7</sup> |             |       |
|                               |                         |          | Test      | 1.16x10 <sup>7</sup>      | 4.69x10 <sup>6</sup> | 6.52x10 <sup>6</sup> | 1.80x10 <sup>7</sup> |             |       |
|                               |                         | Viable   | Control   | 5.85x10 <sup>6</sup>      | 3.76x10 <sup>6</sup> | 1.31x10 <sup>6</sup> | 1.10x10 <sup>7</sup> | 51.78       | 14.69 |
|                               |                         |          | Test      | 5.76x10 <sup>6</sup>      | 3.45x10 <sup>6</sup> | 1.23x10 <sup>6</sup> | 1.08x10 <sup>7</sup> | 46.45       | 14.67 |
|                               | 48                      | Total    | Control   | 1.22x10 <sup>7</sup>      | 4.87x10 <sup>6</sup> | 5.41x10 <sup>6</sup> | 1.82x10 <sup>7</sup> |             |       |
|                               |                         |          | Test      | 1.65x10 <sup>7</sup>      | 6.86x10 <sup>6</sup> | 7.20x10 <sup>6</sup> | 2.59x10 <sup>7</sup> |             |       |
|                               |                         | Viable   | Control   | 6.51x10 <sup>6</sup>      | 2.71x10 <sup>6</sup> | 3.51x10 <sup>6</sup> | 1.08x10 <sup>7</sup> | 56.54       | 19.16 |
|                               |                         |          | Test      | 8.69x10 <sup>6</sup>      | 2.63x10 <sup>6</sup> | 5.02x10 <sup>6</sup> | 1.15x10 <sup>7</sup> | 58.79       | 23.24 |
|                               | 72                      | Total    | Control   | 9.43x10 <sup>6</sup>      | 3.43x10 <sup>6</sup> | 4.17x10 <sup>6</sup> | 1.35x10 <sup>7</sup> |             |       |
|                               |                         |          | Test      | 1.24x10 <sup>7</sup>      | 7.25x10 <sup>6</sup> | 7.06x10 <sup>6</sup> | 2.98x10 <sup>7</sup> |             |       |
|                               |                         | Viable   | Control   | 3.95x10 <sup>6</sup>      | 1.54x10 <sup>6</sup> | 2.21x10 <sup>6</sup> | 6.26x10 <sup>6</sup> | 45.24       | 18.15 |
|                               |                         |          | Test      | 8.30x10 <sup>6*</sup>     | 3.80x10 <sup>6</sup> | 3.08x10 <sup>6</sup> | 1.48x10 <sup>7</sup> | 70.92*      | 25.05 |
| <i>Actinomyces naeslundii</i> | 24                      | Total    | Control   | 7.58x10 <sup>5</sup>      | 4.95x10 <sup>5</sup> | 1.14x10 <sup>5</sup> | 1.31x10 <sup>6</sup> |             |       |
|                               |                         |          | Test      | 1.01x10 <sup>6</sup>      | 8.02x10 <sup>5</sup> | 9.75x10 <sup>4</sup> | 2.18x10 <sup>6</sup> |             |       |
|                               |                         | Viable   | Control   | 4.20x10 <sup>5</sup>      | 3.48x10 <sup>5</sup> | 2.58x10 <sup>4</sup> | 1.03x10 <sup>6</sup> | 66.91       | 30.38 |
|                               |                         |          | Test      | 5.65x10 <sup>5</sup>      | 3.90x10 <sup>5</sup> | 1.01x10 <sup>5</sup> | 1.03x10 <sup>6</sup> | 68.79       | 20.82 |
|                               | 48                      | Total    | Control   | 5.51x10 <sup>5</sup>      | 3.48x10 <sup>5</sup> | 1.10x10 <sup>5</sup> | 1.09x10 <sup>6</sup> |             |       |
|                               |                         |          | Test      | 9.00x10 <sup>5</sup>      | 7.45x10 <sup>5</sup> | 9.02x10 <sup>4</sup> | 2.38x10 <sup>6</sup> |             |       |
|                               |                         | Viable   | Control   | 3.33x10 <sup>5</sup>      | 2.13x10 <sup>5</sup> | 1.10x10 <sup>5</sup> | 6.61x10 <sup>5</sup> | 74.22       | 37.58 |
|                               |                         |          | Test      | 5.72x10 <sup>5</sup>      | 3.96x10 <sup>5</sup> | 9.98x10 <sup>4</sup> | 1.31x10 <sup>6</sup> | 83.24       | 38.63 |
|                               | 72                      | Total    | Control   | 4.43x10 <sup>5</sup>      | 2.93x10 <sup>5</sup> | 7.39x10 <sup>4</sup> | 8.09x10 <sup>5</sup> |             |       |
|                               |                         |          | Test      | 1.21x10 <sup>6</sup>      | 9.92x10 <sup>5</sup> | 4.18x10 <sup>4</sup> | 2.65x10 <sup>6</sup> |             |       |
|                               |                         | Viable   | Control   | 1.98x10 <sup>5</sup>      | 1.21x10 <sup>5</sup> | 7.39x10 <sup>4</sup> | 4.15x10 <sup>5</sup> | 57.1        | 26.76 |
|                               |                         |          | Test      | 4.11x10 <sup>5</sup>      | 3.05x10 <sup>5</sup> | 5.14x10 <sup>4</sup> | 9.60x10 <sup>5</sup> | 58.47       | 39.11 |
| <i>Veillonella parvula</i>    | 24                      | Total    | Control   | 5.18x10 <sup>7</sup>      | 4.45x10 <sup>7</sup> | 6.70x10 <sup>6</sup> | 1.49x10 <sup>8</sup> |             |       |
|                               |                         |          | Test      | 3.48x10 <sup>7</sup>      | 2.11x10 <sup>7</sup> | 6.62x10 <sup>6</sup> | 5.61x10 <sup>7</sup> |             |       |
|                               |                         | Viable   | Control   | 3.31x10 <sup>7</sup>      | 2.14x10 <sup>7</sup> | 6.99x10 <sup>6</sup> | 6.49x10 <sup>7</sup> | 79.09       | 28.19 |
|                               |                         |          | Test      | 2.31x10 <sup>7</sup>      | 1.34x10 <sup>7</sup> | 4.97x10 <sup>6</sup> | 4.38x10 <sup>7</sup> | 76.76       | 30.06 |
|                               | 48                      | Total    | Control   | 4.58x10 <sup>7</sup>      | 3.08x10 <sup>7</sup> | 6.79x10 <sup>6</sup> | 9.32x10 <sup>7</sup> |             |       |
|                               |                         |          | Test      | 5.77x10 <sup>7</sup>      | 4.51x10 <sup>7</sup> | 8.90x10 <sup>6</sup> | 1.31x10 <sup>8</sup> |             |       |
|                               |                         | Viable   | Control   | 2.45x10 <sup>7</sup>      | 1.35x10 <sup>7</sup> | 6.68x10 <sup>6</sup> | 4.25x10 <sup>7</sup> | 67.78       | 26.03 |
|                               |                         |          | Test      | 3.57x10 <sup>7</sup>      | 2.79x10 <sup>7</sup> | 5.63x10 <sup>6</sup> | 8.43x10 <sup>7</sup> | 67.2        | 17.34 |
|                               | 72                      | Total    | Control   | 3.04x10 <sup>7</sup>      | 2.26x10 <sup>7</sup> | 5.15x10 <sup>6</sup> | 6.81x10 <sup>7</sup> |             |       |
|                               |                         |          | Test      | 2.31x10 <sup>7</sup>      | 1.30x10 <sup>7</sup> | 5.45x10 <sup>6</sup> | 4.44x10 <sup>7</sup> |             |       |
|                               |                         | Viable   | Control   | 1.23x10 <sup>7</sup>      | 1.09x10 <sup>7</sup> | 3.49x10 <sup>6</sup> | 3.73x10 <sup>7</sup> | 50.44       | 25.03 |
|                               |                         |          | Test      | 1.05x10 <sup>7</sup>      | 5.73x10 <sup>6</sup> | 3.41x10 <sup>6</sup> | 1.78x10 <sup>7</sup> | 51.21       | 21.46 |

| Species                                      | Incubation time (hours) | Analysis | Condition | Microbial counts (CFU/ml) |                      |                      |                      | % Viability |       |
|----------------------------------------------|-------------------------|----------|-----------|---------------------------|----------------------|----------------------|----------------------|-------------|-------|
|                                              |                         |          |           | Mean                      | (SD)                 | 95% CI               |                      | Mean        | (SD)  |
|                                              |                         |          |           |                           |                      | Lower limit          | Upper limit          |             |       |
| <i>Fusobacterium nucleatum</i>               | 24                      | Total    | Control   | 1.95x10 <sup>6</sup>      | 1.04x10 <sup>6</sup> | 3.64x10 <sup>5</sup> | 3.27x10 <sup>6</sup> |             |       |
|                                              |                         |          | Test      | 2.05x10 <sup>6</sup>      | 8.77x10 <sup>5</sup> | 1.32x10 <sup>6</sup> | 4.17x10 <sup>6</sup> |             |       |
|                                              |                         | Viable   | Control   | 5.96x10 <sup>5</sup>      | 4.57x10 <sup>5</sup> | 4.30x10 <sup>4</sup> | 2.45x10 <sup>5</sup> | 29.12       | 13.21 |
|                                              |                         |          | Test      | 9.39x10 <sup>5</sup>      | 6.15x10 <sup>5</sup> | 1.16x10 <sup>6</sup> | 1.77x10 <sup>6</sup> | 46.1        | 18.89 |
|                                              | 48                      | Total    | Control   | 2.85x10 <sup>6</sup>      | 2.08x10 <sup>6</sup> | 1.70x10 <sup>5</sup> | 5.09x10 <sup>6</sup> |             |       |
|                                              |                         |          | Test      | 1.10x10 <sup>7*</sup>     | 5.45x10 <sup>6</sup> | 4.19x10 <sup>6</sup> | 2.02x10 <sup>7</sup> |             |       |
|                                              |                         | Viable   | Control   | 1.52x10 <sup>6</sup>      | 1.24x10 <sup>6</sup> | 7.17x10 <sup>4</sup> | 3.64x10 <sup>6</sup> | 47.42       | 14.9  |
|                                              |                         |          | Test      | 5.15x10 <sup>6*</sup>     | 3.04x10 <sup>6</sup> | 1.20x10 <sup>6</sup> | 8.35x10 <sup>6</sup> | 48.25       | 12.38 |
|                                              | 72                      | Total    | Control   | 4.15x10 <sup>6</sup>      | 3.45x10 <sup>6</sup> | 6.15x10 <sup>4</sup> | 9.60x10 <sup>6</sup> |             |       |
|                                              |                         |          | Test      | 1.35x10 <sup>7*</sup>     | 5.86x10 <sup>6</sup> | 3.64x10 <sup>6</sup> | 2.12x10 <sup>7</sup> |             |       |
|                                              |                         | Viable   | Control   | 1.31x10 <sup>6</sup>      | 1.07x10 <sup>6</sup> | 8.92x10 <sup>3</sup> | 2.63x10 <sup>6</sup> | 27.42       | 9.711 |
|                                              |                         |          | Test      | 7.53x10 <sup>6*</sup>     | 5.74x10 <sup>6</sup> | 4.54x10 <sup>5</sup> | 1.86x10 <sup>7</sup> | 54.36*      | 26.21 |
| <i>Porphyromonas gingivalis</i>              | 24                      | Total    | Control   | 3.31x10 <sup>4</sup>      | 1.50x10 <sup>4</sup> | 5.20x10 <sup>3</sup> | 4.79x10 <sup>4</sup> |             |       |
|                                              |                         |          | Test      | 3.83x10 <sup>4</sup>      | 2.18x10 <sup>4</sup> | 1.13x10 <sup>4</sup> | 6.20x10 <sup>4</sup> |             |       |
|                                              |                         | Viable   | Control   | 1.43x10 <sup>4</sup>      | 8.24x10 <sup>3</sup> | 6.25x10 <sup>3</sup> | 2.56x10 <sup>4</sup> | 40.27       | 14.91 |
|                                              |                         |          | Test      | 2.21x10 <sup>4</sup>      | 1.27x10 <sup>4</sup> | 6.41x10 <sup>3</sup> | 3.87x10 <sup>4</sup> | 57.3        | 19.82 |
|                                              | 48                      | Total    | Control   | 2.02x10 <sup>5</sup>      | 1.03x10 <sup>5</sup> | 7.29x10 <sup>4</sup> | 3.44x10 <sup>5</sup> |             |       |
|                                              |                         |          | Test      | 4.14x10 <sup>5*</sup>     | 1.86x10 <sup>5</sup> | 1.57x10 <sup>5</sup> | 6.11x10 <sup>5</sup> |             |       |
|                                              |                         | Viable   | Control   | 6.51x10 <sup>4</sup>      | 3.21x10 <sup>4</sup> | 2.84x10 <sup>4</sup> | 1.15x10 <sup>5</sup> | 37.67       | 17.43 |
|                                              |                         |          | Test      | 2.25x10 <sup>5*</sup>     | 1.13x10 <sup>5</sup> | 7.34x10 <sup>4</sup> | 4.07x10 <sup>5</sup> | 54.38*      | 9.468 |
|                                              | 72                      | Total    | Control   | 3.65x10 <sup>5</sup>      | 1.97x10 <sup>5</sup> | 1.10x10 <sup>5</sup> | 5.81x10 <sup>5</sup> |             |       |
|                                              |                         |          | Test      | 1.13x10 <sup>6*</sup>     | 5.51x10 <sup>5</sup> | 6.98x10 <sup>5</sup> | 2.44x10 <sup>6</sup> |             |       |
|                                              |                         | Viable   | Control   | 1.24x10 <sup>5</sup>      | 5.57x10 <sup>4</sup> | 4.93x10 <sup>4</sup> | 2.05x10 <sup>5</sup> | 37.91       | 9.136 |
|                                              |                         |          | Test      | 6.78x10 <sup>5*</sup>     | 1.84x10 <sup>5</sup> | 4.75x10 <sup>5</sup> | 9.28x10 <sup>5</sup> | 65.29*      | 18.16 |
| <i>Aggregatibacter actinomycetemcomitans</i> | 24                      | Total    | Control   | 2.82x10 <sup>6</sup>      | 1.03x10 <sup>6</sup> | 1.35x10 <sup>6</sup> | 3.75x10 <sup>6</sup> |             |       |
|                                              |                         |          | Test      | 2.72x10 <sup>6</sup>      | 8.14x10 <sup>5</sup> | 1.68x10 <sup>6</sup> | 4.07x10 <sup>6</sup> |             |       |
|                                              |                         | Viable   | Control   | 1.10x10 <sup>6</sup>      | 4.24x10 <sup>5</sup> | 1.27x10 <sup>5</sup> | 1.52x10 <sup>6</sup> | 44.34       | 23.92 |
|                                              |                         |          | Test      | 1.49x10 <sup>6</sup>      | 3.53x10 <sup>5</sup> | 9.54x10 <sup>5</sup> | 1.99x10 <sup>6</sup> | 56.01       | 7.191 |
|                                              | 48                      | Total    | Control   | 4.04x10 <sup>6</sup>      | 1.44x10 <sup>6</sup> | 2.15x10 <sup>6</sup> | 6.34x10 <sup>6</sup> |             |       |
|                                              |                         |          | Test      | 3.79x10 <sup>6</sup>      | 1.24x10 <sup>6</sup> | 1.45x10 <sup>6</sup> | 5.41x10 <sup>6</sup> |             |       |
|                                              |                         | Viable   | Control   | 1.38x10 <sup>6</sup>      | 2.43x10 <sup>5</sup> | 9.64x10 <sup>5</sup> | 1.76x10 <sup>6</sup> | 38.36       | 15.88 |
|                                              |                         |          | Test      | 2.11x10 <sup>6*</sup>     | 7.45x10 <sup>5</sup> | 5.47x10 <sup>5</sup> | 3.06x10 <sup>6</sup> | 55.28*      | 10.77 |
|                                              | 72                      | Total    | Control   | 5.01x10 <sup>6</sup>      | 1.37x10 <sup>6</sup> | 3.47x10 <sup>6</sup> | 7.29x10 <sup>6</sup> |             |       |
|                                              |                         |          | Test      | 4.90x10 <sup>6</sup>      | 1.65x10 <sup>6</sup> | 2.52x10 <sup>6</sup> | 6.60x10 <sup>6</sup> |             |       |
|                                              |                         | Viable   | Control   | 1.56x10 <sup>6</sup>      | 3.28x10 <sup>5</sup> | 1.21x10 <sup>6</sup> | 2.16x10 <sup>6</sup> | 32.17       | 6.379 |
|                                              |                         |          | Test      | 3.15x10 <sup>6*</sup>     | 3.63x10 <sup>5</sup> | 2.53x10 <sup>6</sup> | 3.70x10 <sup>6</sup> | 71.99*      | 29.11 |
| <i>Candida albicans</i>                      | 24                      | Total    | Control   |                           |                      |                      |                      |             |       |
|                                              |                         |          | Test      | 2.37x10 <sup>4</sup>      | 7.86x10 <sup>3</sup> | 1.74x10 <sup>4</sup> | 4.05x10 <sup>4</sup> |             |       |
|                                              |                         | Viable   | Control   |                           |                      |                      |                      |             |       |
|                                              |                         |          | Test      | 3.21x10 <sup>3</sup>      | 7.51x10 <sup>2</sup> | 2.30x10 <sup>3</sup> | 4.72x10 <sup>3</sup> | 14.02       | 2.734 |
|                                              | 48                      | Total    | Control   |                           |                      |                      |                      |             |       |
|                                              |                         |          | Test      | 7.65x10 <sup>4</sup>      | 2.72x10 <sup>4</sup> | 3.87x10 <sup>4</sup> | 1.13x10 <sup>5</sup> |             |       |
|                                              |                         | Viable   | Control   |                           |                      |                      |                      |             |       |
|                                              |                         |          | Test      | 3.02x10 <sup>4</sup>      | 1.04x10 <sup>4</sup> | 1.62x10 <sup>4</sup> | 4.36x10 <sup>4</sup> | 45.37       | 23.73 |
|                                              | 72                      | Total    | Control   |                           |                      |                      |                      |             |       |
|                                              |                         |          | Test      | 2.35x10 <sup>5</sup>      | 7.75x10 <sup>4</sup> | 1.26x10 <sup>5</sup> | 3.17x10 <sup>5</sup> |             |       |
|                                              |                         | Viable   | Control   |                           |                      |                      |                      |             |       |
|                                              |                         |          | Test      | 9.12x10 <sup>4</sup>      | 1.90x10 <sup>4</sup> | 6.54x10 <sup>4</sup> | 1.14x10 <sup>5</sup> | 43.84       | 20.06 |
